# Supplementary material for: Clinical Characteristics of Nine Case of Adrenal Tuberculosis and Literature Review
Source: Research Square preprint supplement (doi:10.21203/rs.3.rs-7355816/v1), 2025-09-04
Supplement: Supplementary file 1 [file 538a543d4dc880743a8477ff.xlsx]

## Sheet: Sheet1
Table 2. Clinical Characteristics of 206 Adrenal Tuberculosis Patients from Published Literature
Studies (year)	Country	Numbers	Age (years)	Gender（n）		Symptoms（n）		Extradrenal tuberculosis（n）		Laboratory tests（n）						Combined Addison's disease（n）	Combined adrenal crisis（n）	Computed Tomography manifestations of adrenal tuberculosis（n）								Adrenal gland puncture（n）	Adrenal gland surgical resection（n）	Positive acid-fast staining in adrenal gland biopsy tissue（n）	Positive tuberculosis deoxyribonucleic acid amplification（n）	Pathologically confirmed（n）	Pathological manifestations	Anti-tuberculosis treatment（n）	Cortisol replacement therapy（n）	Recovery（n）	Improvement（n）
				Male	Female	Skin pigmentation	Weakness, Poor appetite	Pulmonary tuberculosis	Other extrapulmonary tuberculosis	Hyponatremia	Hyperkalemia	Elevated ESR	TST positivity	T-SPOT.tuberculosis positivity	QFT positivity			Unilateral	Bilateral	Calcification	Enhancement	Enhanced CT findings	Thickening	Nodule	Mass
Total	China (187 cases), United Kingdom ( 3 cases), India (3 cases), Indonesia (3 cases), South Korea (3 cases), Peru (2 cases), Morocco (1 case), Japan (1 case), Greece (1 case), Vietnam (1 case), Islamic Republic of Pakistan (1 case)	206	20-85	134	72	131	131	84	36	77	36	57	65	23	4	144	12	39	167	103	51	Of the 77 patients who underwent contrast-enhanced CT, enhancement was observed in 51 cases, while 16 cases showed no enhancement	35	40	90	22	39	11	6	60	Among the 60 cases analyzed, pathological results were unavailable for 5 cases. Of the remaining 55 cases with documented pathological findings, granulomatous inflammation was observed in 40 cases, caseous necrosis in 28 cases, and Langhans giant cells in 14 cases	152	106	40	79
Changbin Quan et al. (2015)[5]	China	35	21-75	21	14	13	19	25	9	-	-	-	29	-	-	13	-	7	28	21	19	Out of 35 cases, 26 underwent contrast-enhanced imaging. Among these, 14 cases demonstrated peripheral ring-shaped enhancement, 5 cases exhibited heterogeneous enhancement, and 7 cases showed no enhancement	-	4	14	-	-	-	-	-	-	35	-	-	6
Peijie Du et al. (2018)[6]	China	26	24-64	19	7	26	25	8	-	7	7	9	-	10	-	26	-	-	26	14	-	-	-	-	26	-	-	-	-	-	-	26	26	-	26
Zhuoma Zeding et al. (2023)[7]	China	25	43.0 ± 8.1	18	7	25	21	12	8	19	2	-	-	-	-	25	-	-	25	21	2	Among the 10 patients who underwent contrast-enhanced CT, one case demonstrated marginal enhancement, while another case exhibited enhancement	-	24	-	-	-	-	-	-	-	24	24	13	6
Jianjun Wang et al. (2024)[8]	China	23	20-72	18	5	14	14	17	2	14	14	16	21	-	-	14	-	4	19	-	-	-	-	-	-	14	9	-	-	23	Among the cases analyzed, granulomatous inflammation with necrosis was observed in 14 cases, while Langhans giant cells accompanied by caseous necrosis were identified in 9 cases	-	-	-	-
Hongliang Jia et al. (2017)[9]	China	18	22-72	9	9	8	8	4	2	10	-	6	-	-	-	10	-	4	14	17	-	-	13	4	7	-	2	-	-	2	2 cases of granulomatous inflammation with caseous necrosis	-	-	-	-
Tiantian Chen et al. (2015)[10]	China	16	43±12	11	5	14	12	2	1	3	1	10	7	-	-	13	-	2	14	7	11	Among the 12 patients who underwent contrast-enhanced CT, enhancement was observed in 11 cases, while 1 case showed no enhancement	14	-	-	2	-	-	-	2	One case exhibited granulomatous inflammation, while another demonstrated the presence of Langhans giant cells accompanied by caseous necrosis	14	14	3	11
Daoxin Zhang et al. (2016)[11]	China	5	38-75	3	2	1	1	-	1	-	-	2	-	-	-	3	-	2	3	3	3	Among the five patients who underwent contrast-enhanced CT, one case exhibited enhancement, one demonstrated ring-shaped enhancement, one showed peripheral enhancement, and two cases showed no enhancement	1	2	-	1	2	-	2	3	2 cases of caseous proliferation	4	3	-	4
Zhiyong Shen et al. (2016)[12]	China	3	45-64	2	1	-	-	2	-	-	-	3	3	-	-	3	-	3	-	3	-	No enhancement	-	-	-	-	3	-	-	3	3 cases of granulomatous inflammation with caseous necrosis	3	3	3	-
Shun Wan et al. (2021)[13]	China	2	46, 29	-	2	-	1	-	-	-	-	-	-	-	-	-	-	1	1	-	-	-	-	-	2	-	2	-	-	2	2 cases of granulomatous inflammation with caseous necrosis	2	-	-	-
Chengqing Yang et al. (2020)[14]	China	2	37, 27	2	-	2	2	2	1	2	2	-	1	1	-	2	-	-	2	1	2	One case demonstrated ring-shaped enhancement, while another case exhibited heterogeneous enhancement accompanied by ring-shaped enhancement	1	-	2	1	-	-	-	-	-	2	2	2	-
Bo Jia et al. (2018)[15]	China	2	32, 37	1	1	2	1	-	-	-	-	2	-	2	-	2	-	2	-	-	-	-	-	-	2	-	2	2	-	2	One case exhibited granulomatous inflammation with necrosis, while another demonstrated granulomatous inflammation accompanied by caseous necrosis	1	1	-	1
Juan Eduardo Quiroz-Aldave et al. (2024)[16]	Peru	1	37	-	1	-	-	-	-	-	-	-	-	-	-	-	-	-	1	1	-	-	-	-	1	-	-	-	-	-	-	1	1	-	1
Tian-Xiang Zhang et al. (2024)[17]	China	1	48	-	1	1	1	1	1	1	1	-	-	1	-	1	-	-	1	1	-	-	-	-	1	-	-	-	-	-	-	1	1	-	1
Abhinav Kumar et al. (2024)[18]	India	1	40	-	1	1	1	-	-	-	-	-	-	-	-	1	-	1	-	-	-	-	-	-	1	-	-	-	-	-	-	1	1	-	1
Yu Huang et al. (2024)[19]	China	1	45	1	-	1	-	-	-	-	-	1	-	1	-	1	-	1	-	-	1	Heterogeneous enhancement	-	-	1	-	-	-	-	-	-	1	1	-	1
Matdoan Rifkiah Aisyah et al. (2024)[20]	Indonesia	1	52	-	1	1	1	-	-	1	-	-	-	-	1	1	1	1	-	1	-	-	-	-	1	-	-	-	-	-	-	-	1	-	1
Hao Huang et al. (2023)[21]	China	1	41	-	1	-	-	-	-	-	-	-	-	1	-	-	-	1	-	-	-	-	-	-	1	-	1	-	-	1	-	1	-	-	1
Manal Msirdi et al. (2023)[22]	Morocco	1	60	-	1	1	1	-	-	1	1	-	-	-	1	1	-	-	1	1	-	-	-	1	1	-	-	-	-	-	-	1	1	-	1
Zixin Wu et al. (2023)[23]	China	1	30	1	-	-	-	-	-	-	-	-	-	1	-	-	-	-	1	-	1	Ring-shaped and septal enhancement	-	-	-	1	1	1	1	1	Granulomatous inflammation with necrosis	1	-	1	-
Liandi Wang et al. (2023)[24]	China	1	28	-	1	-	-	-	-	-	-	1	-	-	1	-	-	-	1	-	-	No enhancement	1	-	1	-	-	-	-	-	-	1	-	1	-
Jiawu Li et al. (2023)[25]	China	1	52	1	-	1	-	-	-	-	-	1	-	-	1	1	-	-	1	-	-	-	-	-	-	-	-	1	1	1	Extensive necrosis with chronic inflammatory cell infiltration	-	-	-	-
Xuezhu Wang et al. (2023)[26]	China	1	73	1	-	1	1	-	-	-	-	-	-	-	-	1	1	-	1	1	1	Homogeneous enhancement was observed on the right side, while heterogeneous enhancement was noted on the left side	1	-	-	1	-	-	-	1	Granulomatous inflammation with necrosis	1	1	-	1
Hendra Zufry et al. (2023)[27]	Indonesia	1	38	-	1	-	1	-	-	1	-	-	1	-	-	1	-	1	-	1	-	-	-	-	1	-	-	-	-	-	-	1	1	1	-
Wajeeha Batool et al. (2022)[28]	Islamic Republic of Pakistan	1	25	-	1	1	-	1	1	1	-	1	-	-	-	1	-	-	1	-	-	-	-	-	-	-	-	-	-	-	-	1	1	-	1
Zahid Khan et al. (2022)[29]	United Kingdom	1	59	1	-	1	1	1	1	1	1	-	-	-	-	1	1	-	1	-	-	-	-	-	1	-	-	-	-	-	-	1	1	-	1
Hui Liu et al. (2022)[30]	China	1	42	-	1	-	-	1	1	-	-	-	-	-	-	-	-	1	-	-	-	No enhancement	-	-	1	1	-	-	-	1	Granulomatous inflammation with necrosis and Langhans giant cells	1	-	1	-
Stuti Gupta et al. (2022)[31]	India	1	26	1	-	-	-	-	-	-	-	-	-	-	-	1	-	-	1	1	-	-	-	-	1	-	1	-	-	1	-	1	-	1	-
Dong Liu et al. (2021)[32]	China	1	51	1	-	-	-	-	-	-	-	-	-	-	-	1	-	-	1	-	1	Enhancement	-	-	-	-	1	1	-	1	Granulomatous inflammation with necrosis	1	-	1	-
Nam Quang Tran et al. (2021)[33]	Vietnam	1	39	1	-	1	1	-	-	1	-	-	-	-	-	1	1	-	1	1	-	No enhancement	-	-	1	-	1	-	-	1	Granulomatous inflammation with caseous necrosis and Langerhans cells	1	1	-	1
Yanru Shen et al. (2021)[34]	China	1	38	-	1	1	1	-	-	1	-	1	-	1	-	1	1	-	1	1	1	Ring-shaped enhancement	-	-	-	-	-	-	-	-	-	1	1	1	-
Han Jiang et al. (2021)[35]	China	1	56	-	1	-	-	-	-	-	-	-	-	-	-	-	-	1	-	-	-	-	-	-	1	-	1	-	-	1	-	-	-	1	-
Qiliang Teng et al. (2021)[36]	China	1	59	1	-	-	-	-	-	-	-	-	-	-	-	-	-	1	-	-	1	Marginal enhancement	-	-	1	-	1	-	-	1	Granulomatous inflammation with caseous necrosis	1	-	1	-
Nan Zhao et al. (2021)[37]	China	1	45	1	-	1	-	1	1	1	-	-	-	-	-	1	1	-	1	-	-	-	-	1	-	-	1	1	-	1	Granulomatous inflammation with caseous necrosis	-	-	-	-
Ning Yang et al. (2021)[38]	China	1	40	1	-	-	1	1	1	1	1	-	-	1	-	1	1	-	1	-	-	-	-	1	-	-	-	-	-	-	-	1	1	-	1
Brayan Dávila-Aranda et al. (2020)[39]	Peru	1	23	1	-	1	1	-	-	-	-	-	-	-	-	1	-	-	1	1	-	-	-	-	1	-	-	-	-	-	-	1	1	-	1
Antonios M. Xydakis et al. (2020)[40]	Greece	1	65	1	-	1	1	-	-	1	1	-	-	-	-	1	1	-	1	-	-	-	-	1	1	-	-	-	-	-	-	1	1	-	1
Jie Yu et al. (2020)[41]	China	1	51	-	1	1	-	-	-	-	-	-	-	1	-	1	-	-	1	-	-	-	-	-	1	-	-	-	-	-	-	1	1	1	-
Bobo Xiong et al. (2019)[42]	China	1	42	1	-	-	-	-	-	-	-	-	-	-	-	-	-	1	-	-	-	No enhancement	-	-	1	-	1	-	1	1	Granulomatous inflammation with necrosis	1	1	-	1
Maulee Arambewela et al. (2019)[43]	United Kingdom	1	78	-	1	-	-	-	-	1	-	-	-	-	-	1	1	-	1	-	-	-	-	-	1	-	1	-	-	1	Granulomatous inflammation with caseous necrosis	1	1	-	1
Ning Li et al. (2019)[44]	China	1	49	-	1	-	-	-	-	-	-	-	-	-	-	-	-	1	-	-	1	Heterogeneous enhancement	-	-	1	-	1	1	-	1	Granulomatous inflammation with necrosis	-	-	1	-
Moh Adi Soedarso et al. (2018)[45]	Indonesia	1	43	1	-	1	1	-	-	-	-	-	-	-	-	-	-	-	1	-	-	-	-	-	1	-	1	-	-	1	Caseous necrosis with Langerhans cells	1	1	-	1
Yina Lai et al. (2018)[46]	China	1	35	1	-	-	1	1	-	-	-	-	-	-	-	1	-	-	1	-	-	No enhancement	1	-	-	-	-	-	-	-	-	1	1	-	1
Yaping Luo et al. (2017)[47]	China	1	46	1	-	-	-	-	-	-	-	-	-	1	-	-	-	-	1	-	-	-	1	1	1	-	-	-	-	-	-	1	1	-	1
Sung Ae Koh et al. (2017)[48]	South Korea	1	60	-	1	-	1	-	1	-	-	-	-	-	-	1	-	-	1	-	1	Marginal enhancement	-	-	1	-	-	-	-	-	-	1	1	-	1
Ruimin Ren et al. (2017)[49]	China	1	54	1	-	-	-	-	-	-	-	1	-	-	-	-	-	1	-	-	1	Enhancement	-	-	1	-	1	-	-	1	-	1	-	1	-
S.A. Jang et al. (2017)[50]	South Korea	1	66	-	1	1	1	-	-	1	1	-	-	-	-	1	-	-	1	-	-	-	-	-	1	1	-	-	-	1	Granulomatous inflammation	1	1	-	1
Nicholas Denny et al. (2016)[51]	United Kingdom	1	55	1	-	-	1	-	1	1	1	-	-	-	-	1	1	-	1	-	-	-	-	-	1	-	-	-	-	-	-	1	1	1	-
Xiaobei Duan et al. (2016)[52]	China	1	43	1	-	1	-	-	-	-	-	-	-	-	-	-	-	-	1	1	1	Peripheral enhancement	1	-	-	-	1	1	-	1	Granulomatous inflammation	-	-	-	-
Long Diao et al. (2016)[53]	China	1	40	1	-	1	1	-	-	-	-	-	-	-	-	-	-	-	1	1	1	Heterogeneous enhancement	-	-	1	-	1	-	-	1	Granulomatous inflammation with caseous necrosis	1	1	1	-
Tengyan Yang et al. (2016)[54]	China	1	51	-	1	1	1	-	-	1	-	-	-	-	-	1	-	-	1	-	-	-	-	-	-	-	-	-	-	-	-	1	1	-	1
A.K.R. Gorla et al. (2016)[55]	India	1	50	1	-	1	1	-	-	-	-	-	-	-	-	1	-	-	1	-	-	-	-	-	1	-	1	1	-	1	Granulomatous inflammation with caseous necrosis	1	1	1	-
Yen-Chang Chen et al. (2016)[56]	China	1	86	1	-	-	-	-	-	-	-	-	-	-	-	-	-	1	-	-	-	-	-	-	1	-	1	1	-	1	Granulomatous inflammation with caseous necrosis and Langerhans cells	-	-	-	-
Liping Zou et al. (2015)[57]	China	1	40	1	-	1	1	1	-	1	1	-	-	-	-	1	1	1	-	1	-	No enhancement	-	-	1	-	-	-	-	-	-	1	1	1	-
Panyun Xiao et al. (2015)[58]	China	1	46	1	-	-	1	1	1	1	-	-	-	-	-	1	-	-	1	-	-	-	-	-	1	-	-	-	-	-	-	1	1	1	-
Quan Long et al. (2015)[59]	China	1	34	1	-	1	1	-	-	1	-	1	1	1	-	1	-	-	1	-	1	Marginal enhancement	-	-	1	-	-	-	-	-	-	1	1	1	-
Fengying Cai et al. (2015)[60]	China	1	70	1	-	1	1	1	1	1	-	-	-	1	-	1	-	-	1	1	-	-	1	-	-	-	-	-	-	-	-	1	1	-	1
Yeun Yoon Kim et al. (2015)[61]	South Korea	1	64	-	1	-	1	-	1	1	-	-	-	-	-	1	-	-	1	-	-	-	-	1	1	-	1	-	1	1	Granulomatous inflammation with caseous necrosis	-	-	-	-
Rui Zhao et al. (2014)[62]	China	1	35	1	-	1	1	1	-	1	1	1	1	-	-	1	1	-	1	1	-	No enhancement	-	-	1	-	-	-	-	-	-	1	1	-	1
Taku Mochizuki et al. (2014)[63]	Japan	1	75	1	-	-	-	1	-	-	-	-	-	-	-	-	-	1	-	-	1	Heterogeneous enhancement	-	-	1	-	1	1	-	1	Caseous necrosis	1	-	-	1
Biswas Shrestha et al. (2014)[64]	China	1	36	1	-	1	1	-	1	1	1	1	1	-	-	1	-	-	1	1	1	Heterogeneous enhancement	-	-	1	-	-	-	-	-	-	1	1	1	-
